# Supplementary material
Source: PubMed Central journal article supplement (PMC6727385)
Supplement: jm9b00208_si_001.pdf [file jm9b00208_si_001.pdf]

## Supporting Information

“Vitamin D and its synthetic analogs” by Miguel A. Maestro, Ferdinand Molnár and Carsten Carlberg

**Table S1** describes all 143 publically available VDR ligand crystal structures with individual hyperlinks to the PDB and Pubmed databases.

| Orthologue   | PDBID <sup>1</sup> | Resolution <sup>2</sup> | Reference | Ligand Name/Notes                | Ligand Conformation <sup>3</sup>                          | PDBID <sup>1</sup> | Resolution <sup>2</sup> | Reference | Ligand Name/Notes                                                                                    | Ligand Conformation <sup>3</sup>                            |
|--------------|--------------------|-------------------------|-----------|----------------------------------|-----------------------------------------------------------|--------------------|-------------------------|-----------|------------------------------------------------------------------------------------------------------|-------------------------------------------------------------|
| <b>HUMAN</b> | 1DB1               | 1.8 Å                   | [28]      | Calcitriol (1,25D <sub>3</sub> ) | <br>VDX (C <sub>27</sub> H <sub>44</sub> O <sub>3</sub> ) | 3CS4               | 2 Å                     | [99]      | AMCR277A                                                                                             | <br>COV (C <sub>28</sub> H <sub>44</sub> O <sub>4</sub> )   |
|              | 1IE8               | 1.52 Å                  | [90]      | Lexacalcitol (KH1060)            | <br>KH1 (C <sub>29</sub> H <sub>48</sub> O <sub>4</sub> ) | 3CS6               | 1.8 Å                   |           | AMCR277B                                                                                             | <br>OCO (C <sub>28</sub> H <sub>44</sub> O <sub>4</sub> )   |
|              | 1IE9               | 1.4 Å                   |           | 20-epi calcitriol (MC1288)       | <br>VDX (C <sub>27</sub> H <sub>44</sub> O <sub>3</sub> ) | 3KPZ               | 1.9 Å                   | [100]     | ZK203278                                                                                             | <br>ZNE (C <sub>28</sub> H <sub>41</sub> NO <sub>3</sub> S) |
|              | 1SOZ               | 2.5 Å                   | [91]      | Seocalcitol (EB1089)             | <br>EB1 (C <sub>30</sub> H <sub>46</sub> O <sub>3</sub> ) | 3M7R               | 1.8 Å                   | [101]     | 1,25D <sub>3</sub><br>hVDR_H305Q                                                                     | <br>VDX (C <sub>27</sub> H <sub>44</sub> O <sub>3</sub> )   |
|              | 1S19               | 2.1 Å                   |           | Calcipotriol (MC903)             | <br>MC9 (C <sub>27</sub> H <sub>40</sub> O <sub>3</sub> ) | 3OGT               | 1.75 Å                  | —         | Same as 3TKC                                                                                         | <br>FMV (C <sub>28</sub> H <sub>40</sub> O <sub>4</sub> )   |
|              | 1TXI               | 1.9 Å                   | [92]      | Inecalcitol (TX522)              | <br>TX5 (C <sub>27</sub> H <sub>40</sub> O <sub>3</sub> ) | 3P8X               | 1.7 Å                   | [102]     | 20(17→18)-abeo-1α,25-dihydroxy-22-homo-21-norvitamin D <sub>3</sub>                                  | <br>ZYD (C <sub>27</sub> H <sub>44</sub> O <sub>3</sub> )   |
|              | 2HAM               | 1.9 Å                   | [93]      | 2α-propyl-1,25D <sub>3</sub>     | <br>C33 (C <sub>30</sub> H <sub>50</sub> O <sub>3</sub> ) | 3TKC               | 1.75 Å                  | [103]     | (20S)-[5-(2-Hydroxypropan-2-yl)furan-2yl]-22,23,24,25,26,27-hexanor-1α-hydroxyvitamin D <sub>3</sub> | <br>FMV (C <sub>28</sub> H <sub>40</sub> O <sub>4</sub> )   |

| Orthologue | PDBID <sup>1</sup> | Resolution <sup>2</sup> | Reference | Ligand Name/Notes                                    | Ligand Conformation <sup>3</sup>                      | PDBID <sup>1</sup> | Resolution <sup>2</sup> | Reference | Ligand Name/Notes                                                                                                                                      | Ligand Conformation <sup>3</sup>                                     |
|------------|--------------------|-------------------------|-----------|------------------------------------------------------|-------------------------------------------------------|--------------------|-------------------------|-----------|--------------------------------------------------------------------------------------------------------------------------------------------------------|----------------------------------------------------------------------|
| HUMAN      | 2HAR               | 1.9 Å                   |           | 2 $\alpha$ -(3-hydroxy-1-propoxy)-1,25D <sub>3</sub> | OCC (C <sub>30</sub> H <sub>50</sub> O <sub>5</sub> ) | 3VHW               | 2.43 Å                  | [104]     | 2-(3-hydroxypropoxy)-25-oxocyclopentane-carboxylate-1 $\alpha$ -hydroxyvitamin D <sub>3</sub>                                                          | VHW (C <sub>34</sub> H <sub>50</sub> O <sub>7</sub> )                |
|            | 2HAS               | 1.96 Å                  | [93]      | 2 $\alpha$ -(1-propoxy)-1,25D <sub>3</sub>           | C30 (C <sub>30</sub> H <sub>50</sub> O <sub>4</sub> ) | 3W0A               | 1.8 Å                   |           | (4S)-4-hydroxy-5-[2-methyl-4-(3-{3-methyl-4-[4,4,4-trifluoro-3-hydroxy-3-(trifluoromethyl)but-1-yn-1-yl]phenyl}pentan-3-yl)phenoxy]pentanoic acid      | DS5 (C <sub>29</sub> H <sub>32</sub> F <sub>6</sub> O <sub>5</sub> ) |
|            | 2HB7               | 1.8 Å                   |           | 2 $\alpha$ -(3-hydroxy-1-propyl)-1,25D <sub>3</sub>  | O1C (C <sub>30</sub> H <sub>50</sub> O <sub>4</sub> ) | 3W0C               | 1.9 Å                   | [105]     | (4S)-4-hydroxy-5-[2-methyl-4-(3-{3-methyl-4-[(1E)-4,4,4-trifluoro-3-hydroxy-3-(trifluoromethyl)but-1-en-1-yl]phenyl}pentan-3-yl)phenoxy]pentanoic acid | 6DS (C <sub>29</sub> H <sub>34</sub> F <sub>6</sub> O <sub>5</sub> ) |
|            | 2HB8               | 2 Å                     |           | 2 $\alpha$ -methyl-1,25D <sub>3</sub>                | MVD (C <sub>28</sub> H <sub>46</sub> O <sub>3</sub> ) | 3W0Y               | 1.98 Å                  |           | [3-fluoro-2'-methyl-4'-(3-{3-methyl-4-[(1E)-4,4,4-trifluoro-3-hydroxy-3-(trifluoromethyl)but-1-en-1-yl]phenyl}pentan-3-yl)biphenyl-4-yl]acetic acid    | DS4 (C <sub>32</sub> H <sub>31</sub> F <sub>7</sub> O <sub>3</sub> ) |
|            | 3A2I               | 3.27 Å                  | [94]      | TEI-9647<br>hVDR_H305F                               | TEJ (C <sub>27</sub> H <sub>38</sub> O <sub>4</sub> ) | 3WGP               | 2 Å                     | —         | 2 $\beta$ -(3-hydroxy-1-propoxy)-1,25D <sub>3</sub><br><br>(see PDBID: 2HAR)                                                                           | ED9 (C <sub>30</sub> H <sub>50</sub> O <sub>5</sub> )                |
|            | 3A2J               | 2.7 Å                   |           | TEI-9647<br>hVDR_H305F/H397F                         | TEJ (C <sub>27</sub> H <sub>38</sub> O <sub>4</sub> ) | 3WWR               | 3.18 Å                  | [106]     | 2 $\alpha$ -oxy-methylcyclopropanecarbonitrile-1,25D <sub>3</sub>                                                                                      | 3AJ (C <sub>32</sub> H <sub>49</sub> O <sub>4</sub> )                |
|            | 3A3Z               | 1.72 Å                  | [95]      | 2 $\alpha$ -methyl-AMCR277A(C23S)                    | 2MV (C <sub>29</sub> H <sub>46</sub> O <sub>4</sub> ) | 3X3I               | 2.11 Å                  | [107]     | 7,8-cis-14- <i>epi</i> -19- <i>nor</i> -1,25D <sub>3</sub>                                                                                             | 41V (C <sub>26</sub> H <sub>44</sub> O <sub>3</sub> )                |

| Orthologue   | PDBID <sup>1</sup> | Resolution <sup>2</sup> | Reference | Ligand Name/Notes                                                                                            | Ligand Conformation <sup>3</sup>                      | PDBID <sup>1</sup> | Resolution <sup>2</sup> | Reference | Ligand Name/Notes                                                                                                             | Ligand Conformation <sup>3</sup>                                      |
|--------------|--------------------|-------------------------|-----------|--------------------------------------------------------------------------------------------------------------|-------------------------------------------------------|--------------------|-------------------------|-----------|-------------------------------------------------------------------------------------------------------------------------------|-----------------------------------------------------------------------|
| <b>HUMAN</b> | 3A40               | 1.45 Å                  | [95]      | 2α-methyl-AMCR277B(C23R)                                                                                     | 3EV (C <sub>27</sub> H <sub>44</sub> O <sub>3</sub> ) | 3X36               | 1.93 Å                  | [107]     | 7,8-cis-19-nor-1,25D <sub>3</sub>                                                                                             | 41W (C <sub>26</sub> H <sub>44</sub> O <sub>3</sub> )                 |
|              | 3A78               | 1.9 Å                   | [96]      | 1,25-3-epi-D <sub>3</sub>                                                                                    | 3EV (C <sub>27</sub> H <sub>44</sub> O <sub>3</sub> ) | 4G2I               | 1.8 Å                   | [108]     | CD4528                                                                                                                        | 0VQ (C <sub>25</sub> H <sub>26</sub> F <sub>6</sub> O <sub>3</sub> )  |
|              | 3AUQ               | 2.64 Å                  | [76]      | 14-epi-2α-methyl-1α, 25(OH) <sub>2</sub> -6,7-dehydro-19-norvitamin D <sub>3</sub>                           | CA9 (C <sub>27</sub> H <sub>42</sub> O <sub>3</sub> ) | 4ITE               | 2.49 Å                  | [109]     | 2α-[2-(tetrazol-2-yl)ethyl]-1,25D <sub>3</sub>                                                                                | TEY (C <sub>30</sub> H <sub>48</sub> N <sub>4</sub> O <sub>3</sub> )  |
|              | 3AUR               | 2.21 Å                  |           | 14-epi-2β-methyl-1α, 25(OH) <sub>2</sub> -6,7-dehydro-19-norvitamin D <sub>3</sub>                           | CA9 (C <sub>27</sub> H <sub>42</sub> O <sub>3</sub> ) | 4ITF               | 2.84 Å                  |           | 2α-[2-(tetrazol-1-yl)ethyl]-1,25D <sub>3</sub>                                                                                | TFY (C <sub>30</sub> H <sub>48</sub> N <sub>4</sub> O <sub>3</sub> )  |
|              | 3AX8               | 2.6 Å                   | [97]      | 15R-methoxy-1,25D <sub>3</sub>                                                                               | EIM (C <sub>28</sub> H <sub>46</sub> O <sub>4</sub> ) | 4Q0A               | 1.9 Å                   | [110]     | Lithocholic acid                                                                                                              | 40A (C <sub>24</sub> H <sub>40</sub> O <sub>3</sub> )                 |
|              | 3AZ1               | 1.5 Å                   | [98]      | (4-{1-Ethyl-1-[4-(2-hydroxy-3,3-dimethyl-butoxy)-3-methyl-phenyl]-propyl}-2-methyl-phenoxy)-acetic acid      | DS2 (C <sub>27</sub> H <sub>38</sub> O <sub>5</sub> ) | 5GT4 (4PA2)        | 1.83 Å                  | [106]     | 2α-oxy-butanenitrile-1,25D <sub>3</sub>                                                                                       | 2KB (C <sub>31</sub> H <sub>49</sub> NO <sub>4</sub> )                |
|              | 3AZ2               | 1.69 Å                  |           | 5-(4-{1-Ethyl-1-[4-(2-hydroxy-3,3-dimethyl-butoxy)-3-methyl-phenyl]-propyl}-2-methyl-phenoxy)-pentanoic acid | DS3 (C <sub>30</sub> H <sub>44</sub> O <sub>5</sub> ) | 5V39               | 2.2 Å                   | [111]     | 5-(3-{4-[(2S)-2-hydroxy-3,3-dimethylbutoxy]-3-methyl-phenyl}pentan-3-yl)-3-methyl-N-(1H-tetrazol-5-yl)thiophene-2-carboxamide | 8VM (C <sub>25</sub> H <sub>35</sub> N <sub>5</sub> O <sub>3</sub> S) |

|              | Orthologue | PDBID <sup>1</sup> | Resolution <sup>2</sup> | Reference | Ligand Name/Notes                                                                                                           | Ligand Conformation <sup>3</sup>                      |  | PDBID <sup>1</sup> | Resolution <sup>2</sup> | Reference | Ligand Name/Notes                                                                                                                                   | Ligand Conformation <sup>3</sup>                      |
|--------------|------------|--------------------|-------------------------|-----------|-----------------------------------------------------------------------------------------------------------------------------|-------------------------------------------------------|--|--------------------|-------------------------|-----------|-----------------------------------------------------------------------------------------------------------------------------------------------------|-------------------------------------------------------|
| <b>HUMAN</b> |            | 3AZ3               | 1.36 Å                  | [98]      | 5-(4-{1-Ethyl-1-[4-(3-hydroxy-4,4-dimethyl-pentyl)-3-methyl-phenyl]-propyl}-2-methyl-pheno-xy)-4(S)-hydroxy- pentanoic acid | DS6 (C <sub>31</sub> H <sub>46</sub> O <sub>5</sub> ) |  | 5YSY               | 2.0 Å                   | [112]     | 14-epi-2α-(3-hydroxypropyl)-19-nortachysterol                                                                                                       | 90L (C <sub>29</sub> H <sub>48</sub> O <sub>4</sub> ) |
|              |            | 3BOT               | 1.3 Å                   | —         | 1,25-22-oxa-D <sub>3</sub> (Maxacalcitol)                                                                                   | MCZ (C <sub>26</sub> H <sub>42</sub> O <sub>4</sub> ) |  | 5YT2               | 2.0 Å                   |           | 14-epi-2β-(3-hydroxypropyl)-19-nortachysterol                                                                                                       | 900 (C <sub>29</sub> H <sub>48</sub> O <sub>4</sub> ) |
| <b>RAT</b>   |            | 1RJK               | 1.99 Å                  |           | 2-methylene-19-nor-(20S)-1,25D <sub>3</sub> + DRIP205 (NR2) <sup>4</sup>                                                    | VDZ (C <sub>27</sub> H <sub>44</sub> O <sub>3</sub> ) |  | 3VTD               | 2.7 Å                   | [122]     | 2-methylidene-25S-26-adamantyl-19,27-dinor vitamin-1,25D <sub>3</sub> (ADTK4) + DRIP205 (NR2) <sup>4</sup>                                          | TKD (C <sub>36</sub> H <sub>52</sub> O <sub>3</sub> ) |
|              |            | 1RK3               | 2.2 Å                   | [113]     | 1,25D <sub>3</sub> + DRIP 205 (NR2) <sup>4</sup>                                                                            | VDX (C <sub>27</sub> H <sub>44</sub> O <sub>3</sub> ) |  | 3W0G               | 1.94 Å                  |           | (2S)-3-{4-[2-(4-{{(2R)-2-hydroxy-3,3-dimethylbutyl} oxy) phenyl}propan-2-yl]phenoxy} propane-1,2-diol + DRIP205 (NR2) <sup>4</sup>                  | W07 (C <sub>24</sub> H <sub>34</sub> O <sub>5</sub> ) |
|              |            | 1RKG               | 1.9 Å                   |           | 1α-hydroxy-2-methylene-19-nor-(20S)-bishomopregnacalciferol + DRIP 205 (NR2) <sup>4</sup>                                   | VD1 (C <sub>23</sub> H <sub>36</sub> O <sub>2</sub> ) |  | 3W0H               | 1.8 Å                   | [123]     | (2S)-3-{4-[4-{{(2R)-2-hydroxy-3,3-dimethylbutyl} oxy) phenyl}heptan-4-yl]phenoxy} propane-1,2-diol + DRIP205 (NR2) <sup>4</sup>                     | W12 (C <sub>28</sub> H <sub>42</sub> O <sub>5</sub> ) |
|              |            | 1RKH               | 2.28 Å                  |           | 2α-methylene-19-nor-1,25D <sub>3</sub> + DRIP205 (NR2) <sup>4</sup>                                                         | VD2 (C <sub>27</sub> H <sub>46</sub> O <sub>3</sub> ) |  | 3W0I               | 1.9 Å                   |           | (2S)-3-{4-[3-{{(2R)-2-hydroxy-3,3-dimethylbutyl} oxy) phenyl}pentan-3-yl]phenoxy} propane-1,2-diol + DRIP205 (NR2) <sup>4</sup>                     | O11 (C <sub>26</sub> H <sub>38</sub> O <sub>5</sub> ) |
|              |            | 204J               | 1.74 Å                  | [114]     | 17Z-1,25-17(20)-dehydro-2-methylene-19-nor-D <sub>3</sub> + DRIP205 (NR2) <sup>4</sup>                                      | VD4 (C <sub>27</sub> H <sub>42</sub> O <sub>3</sub> ) |  | 3W0J               | 1.84 Å                  |           | (2S)-3-{4-[2-(4-{{(2R)-2-hydroxy-3,3-dimethylbutyl} oxy)-3-methylphenyl}propan-2-yl]-2-methylphenoxy} propane-1,2-diol + DRIP205 (NR2) <sup>4</sup> | T08 (C <sub>26</sub> H <sub>38</sub> O <sub>5</sub> ) |

| Orthologue | PDBID <sup>1</sup> | Resolution <sup>2</sup> | Reference | Ligand Name/Notes                                                                                                           | Ligand Conformation <sup>3</sup>                       | PDBID <sup>1</sup> | Resolution <sup>2</sup> | Reference | Ligand Name/Notes                                                                                        | Ligand Conformation <sup>3</sup>                      |
|------------|--------------------|-------------------------|-----------|-----------------------------------------------------------------------------------------------------------------------------|--------------------------------------------------------|--------------------|-------------------------|-----------|----------------------------------------------------------------------------------------------------------|-------------------------------------------------------|
| RAT        | 204R               | 1.98 Å                  | [114]     | 17E-1,25-17(20)-dehydro-2-methylene-19-nor-D <sub>3</sub> + DRIP205 (NR2) <sup>4</sup>                                      | VD5 (C <sub>27</sub> H <sub>42</sub> O <sub>3</sub> )  | 3W5P               | 1.9 Å                   |           | Lithocholic acid + DRIP205 (NR2) <sup>4</sup>                                                            | 40A (C <sub>24</sub> H <sub>40</sub> O <sub>3</sub> ) |
|            | 2ZFX               | 1.99 Å                  | [115]     | YR301 + DRIP205 (NR2) <sup>4</sup>                                                                                          | YR3 (C <sub>28</sub> H <sub>42</sub> O <sub>5</sub> )  | 3W5Q               | 1.9 Å                   |           | 3-keto-lithocholic acid + DRIP205 (NR2) <sup>4</sup>                                                     | 3KL (C <sub>24</sub> H <sub>38</sub> O <sub>3</sub> ) |
|            | 2ZL9               | 1.9 Å                   |           | (20S)-1,25-2β-(2-hydroxy ethoxy)-16-ene-22-thia-26,27-dimethyl-19,24-dinor-D <sub>3</sub> + DRIP205 (NR2) <sup>4</sup>      | VDA (C <sub>28</sub> H <sub>46</sub> O <sub>5</sub> S) | 3W5R               | 2.2 Å                   | [124]     | Lithocholic acid acetate + DRIP205 (NR2) <sup>4</sup>                                                    | LOA (C <sub>26</sub> H <sub>42</sub> O <sub>4</sub> ) |
|            | 2ZLA               | 2 Å                     | [116]     | (20R)-1,25-2β-(2-hydroxy ethoxy)-16-ene-22-thia-26,27-dimethyl-19,24-dinor-D <sub>3</sub> + DRIP205 (NR2) <sup>4</sup>      | VDB (C <sub>28</sub> H <sub>46</sub> O <sub>5</sub> S) | 3W5T               | 2.29 Å                  |           | Lithocholic acid propionate + DRIP205 (NR2) <sup>4</sup>                                                 | LHP (C <sub>27</sub> H <sub>44</sub> O <sub>4</sub> ) |
|            | 2ZLC               | 2 Å                     |           | 1,25D <sub>3</sub> + DRIP205 (NR2) <sup>4</sup>                                                                             | VDX (C <sub>27</sub> H <sub>44</sub> O <sub>3</sub> )  | 3WT5               | 1.9 Å                   |           | 22R-Butyl-2-methylidene-26,27-dimethyl-19,24-dinor-1α,25-1,25D <sub>3</sub> + DRIP205 (NR2) <sup>4</sup> | YA1 (C <sub>31</sub> H <sub>52</sub> O <sub>3</sub> ) |
|            | 2ZMH               | 2.1 Å                   |           | (25R)-25-adamantyl-1,25-2-methylene-22,23-didehydro-19,26,27-trinor-20-epi-D <sub>3</sub> + DRIP205 (NR2) <sup>4</sup>      | NYA (C <sub>34</sub> H <sub>50</sub> O <sub>3</sub> )  | 3WT6               | 2 Å                     | [125]     | 22R-Butyl-2-methylidene-26,27-dimethyl-19,24-dinor-1α,25-1,25D <sub>3</sub> + DRIP205 (NR2) <sup>4</sup> | YA1 (C <sub>31</sub> H <sub>52</sub> O <sub>3</sub> ) |
|            | 2ZMI               | 1.7 Å                   | [117]     | (24R)-24-adamantyl-1,24-2-methylene-22,23-didehydro-19,25,26,27-tetranor-20-epi-D <sub>3</sub> + DRIP205 (NR2) <sup>4</sup> | TT2 (C <sub>35</sub> H <sub>52</sub> O <sub>3</sub> )  | 3WT7               | 2.4 Å                   |           | 22R-Butyl-2-methylidene-26,27-dimethyl-19,24-dinor-1,25D <sub>3</sub> + DRIP205 (NR2) <sup>4</sup>       | YA2 (C <sub>32</sub> H <sub>54</sub> O <sub>3</sub> ) |

| Orthologue | PDBID <sup>1</sup> | Resolution <sup>2</sup> | Reference | Ligand Name/Notes                                                                                                                 | Ligand Conformation <sup>3</sup>                                                                                                                              | PDBID <sup>1</sup> | Resolution <sup>2</sup> | Reference | Ligand Name/Notes                                                                                                                    | Ligand Conformation <sup>3</sup>                                                                                                                |
|------------|--------------------|-------------------------|-----------|-----------------------------------------------------------------------------------------------------------------------------------|---------------------------------------------------------------------------------------------------------------------------------------------------------------|--------------------|-------------------------|-----------|--------------------------------------------------------------------------------------------------------------------------------------|-------------------------------------------------------------------------------------------------------------------------------------------------|
| RAT        | 2ZMJ               | 2.35 Å                  | [117]     | 26-adamantyl-1,25R-2-methylene-22,23-didehydro-19,27-dinor-20-epi-D <sub>3</sub><br>+ DRIP205 (NR2) <sup>4</sup>                  | 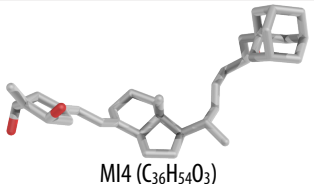<br>MI4 (C <sub>36</sub> H <sub>54</sub> O <sub>3</sub> )                   | 4YNK               | 2.3 Å                   | [126]     | 25-Hydroxy-25(or 26)-adamantyl-17-[20(22),23-diyanyl]-19,21,26,27-tetranorvitamin-1,25D <sub>3</sub><br>+ DRIP205 (NR2) <sup>4</sup> | <br>YW2 (C <sub>34</sub> H <sub>44</sub> O <sub>3</sub> )    |
|            | 2ZXM               | 3.01 Å                  | [118]     | (22S)-butyl-1,24-24,25,26-trinor-D <sub>3</sub><br>+ DRIP205 (NR2) <sup>4</sup>                                                   | <br>JB1 (C <sub>28</sub> H <sub>46</sub> O <sub>3</sub> )                   | 5AWJ               | 2.2 Å                   | [127]     | 2-methylene-22S-Hexyl-19,25,26,27-tetranor-1,25D <sub>3</sub><br>+ DRIP205 (NR2) <sup>4</sup>                                        | <br>YSL (C <sub>30</sub> H <sub>50</sub> O <sub>3</sub> )    |
|            | 2ZXN               | 2.1 Å                   |           | 20S(22S)-butyl-1,24-24,25,26-trinor-D <sub>3</sub><br>+ DRIP205 (NR2) <sup>4</sup>                                                | <br>JC1 (C <sub>28</sub> H <sub>46</sub> O <sub>3</sub> )                   | 5AWK               | 2.9 Å                   |           | 2-methylene-22S-ethyl-19,25,26,27-tetranor-1,25D <sub>3</sub><br>+ DRIP205 (NR2) <sup>4</sup>                                        | <br>YSE (C <sub>26</sub> H <sub>42</sub> O <sub>3</sub> )    |
|            | 3A2H               | 2.5 Å                   | [94]      | TEI-9647<br>+ DRIP205 (NR2) <sup>4</sup>                                                                                          | <br>TEJ (C <sub>27</sub> H <sub>38</sub> O <sub>4</sub> )                   | 5B41               | 1.89 Å                  | [128]     | 2-methylidene-19-nor-1,25D <sub>3</sub><br>+ DRIP205 (NR2) <sup>4</sup>                                                              | <br>YSV (C <sub>27</sub> H <sub>44</sub> O <sub>3</sub> )    |
|            | 3AFR               | 2 Å                     | [119]     | 22S-Butyl-1,24R-dihydroxyvitamin D <sub>3</sub><br>+ DRIP205 (NR2) <sup>4</sup>                                                   | <br>ICJ (C <sub>31</sub> H <sub>52</sub> O <sub>3</sub> )                  | 5B5B               | 2 Å                     | [129]     | 2-methylidene-26,27-diphenyl-19-nor-1,25D <sub>3</sub><br>+ DRIP205 (NR2) <sup>4</sup>                                               | <br>AKX (C <sub>39</sub> H <sub>52</sub> O <sub>3</sub> )   |
|            | 3AUN               | 1.81 Å                  | [120]     | YR335<br>+ DRIP205 (NR2) <sup>4</sup>                                                                                             | <br>YR4 (C <sub>29</sub> H <sub>44</sub> O <sub>5</sub> )                 | 5GIC               | 2.35 Å                  |           | 26,23-lactam-N-phenethyl-1,25D <sub>3</sub><br>+ DRIP205 (NR2) <sup>4</sup>                                                          | <br>DLC (C <sub>35</sub> H <sub>51</sub> NO <sub>4</sub> ) |
|            | 3VJS               | 1.93 Å                  | [78]      | 1-(2-[(S)-2,4-Dihydroxybutoxy]ethyl)-12-(5-ethyl-5-hydroxyheptyl)-1,12-dicarba-closo-dodecaborane<br>+ DRIP205 (NR2) <sup>4</sup> | <br>10S (C <sub>17</sub> H <sub>42</sub> B <sub>10</sub> O <sub>4</sub> ) | 5GID               | 2.15 Å                  | [130]     | 26,23-lactam-N-phenylbutyl-1,25D <sub>3</sub><br>+ DRIP205 (NR2) <sup>4</sup>                                                        | <br>VDP (C <sub>37</sub> H <sub>53</sub> NO <sub>4</sub> ) |

| Orthologue | PDBID <sup>1</sup> | Resolution <sup>2</sup> | Reference | Ligand Name/Notes                                                                                                              | Ligand Conformation <sup>3</sup>                                      | PDBID <sup>1</sup> | Resolution <sup>2</sup> | Reference | Ligand Name/Notes                                                                                                                  | Ligand Conformation <sup>3</sup>                          |
|------------|--------------------|-------------------------|-----------|--------------------------------------------------------------------------------------------------------------------------------|-----------------------------------------------------------------------|--------------------|-------------------------|-----------|------------------------------------------------------------------------------------------------------------------------------------|-----------------------------------------------------------|
| RAT        | 3VJT               | 2 Å                     | [78]      | 1-(2-[(R)-2,4-Dihydroxybutoxy]ethyl)-12-(5-ethyl-5-hydroxyheptyl)-1,12-dicarba-closo-dodecaborane + DRIP205 (NR2) <sup>4</sup> | 10R (C <sub>17</sub> H <sub>42</sub> B <sub>10</sub> O <sub>4</sub> ) | 5GIE               | 2.39 Å                  | [130]     | 26,23-lactam-N-phenylbutyl-1,25D <sub>3</sub> + DRIP205 (NR2) <sup>4</sup>                                                         | VDP (C <sub>37</sub> H <sub>53</sub> NO <sub>4</sub> )    |
|            | 3VRT               | 2.4 Å                   |           | 2-methylidene-17-[(2R)-5-hydroxypentan-2-yl]- + DRIP205 (NR2) <sup>4</sup>                                                     | YS2 (C <sub>24</sub> H <sub>38</sub> O <sub>3</sub> )                 | 5H1E               | 2.6 Å                   | [131]     | 1,25D <sub>3</sub> + TIF2 (NR2) <sup>5</sup>                                                                                       | VDX (C <sub>27</sub> H <sub>44</sub> O <sub>3</sub> )     |
|            | 3VRU               | 2 Å                     | [54]      | 2-methylidene-17-[(2R)-5-hydroxy-5-methylhexan-2-yl]-1,25D <sub>3</sub> + DRIP205 (NR2) <sup>4</sup>                           | YS3 (C <sub>26</sub> H <sub>42</sub> O <sub>3</sub> )                 | 5XPL               | 2.05 Å                  |           | 22S-butyl-25-hydroxyphenyl-2-methylidene-19,26,27-trinor-25-oxo-1-hydroxyvitamin D <sub>3</sub> + TIF2 (NR2) <sup>5</sup>          | 8C9 (C <sub>35</sub> H <sub>50</sub> O <sub>4</sub> )     |
|            | 3VRV               | 1.9 Å                   |           | 2-methylidene-17-[(2R)-5-ethyl-5-hydroxyheptan-2-yl]- + DRIP205 (NR2) <sup>4</sup>                                             | YSD (C <sub>28</sub> H <sub>46</sub> O <sub>3</sub> )                 | 5XPM               | 2.2 Å                   |           | 22S-Butyl-25RS-hydroxyphenyl-25-methoxy-2-methylidene-19,26,27-trinor-1-hydroxyvitamin D <sub>3</sub> + DRIP205 (NR2) <sup>4</sup> | 8C0 (C <sub>36</sub> H <sub>54</sub> O <sub>4</sub> )     |
|            | 3VRW               | 2.4 Å                   |           | 2-methylidene-17-[(2R,3S)-3-butyl-5-ethyl-5-hydroxyheptan-2-yl]-1,25D <sub>3</sub> + DRIP205 (NR2) <sup>4</sup>                | YS5 (C <sub>32</sub> H <sub>54</sub> O <sub>3</sub> )                 | 5XPN               | 1.96 Å                  | [132]     | 25RS-(hydroxyphenyl)-25-methoxy-2-methylidene-19,26,27-trinor-1-hydroxyvitamin D <sub>3</sub> + DRIP205 (NR2) <sup>4</sup>         | 8B0 9RO (C <sub>32</sub> H <sub>46</sub> O <sub>4</sub> ) |
|            | 3VT3               | 1.7 Å                   | [121]     | 1,25D <sub>3</sub> + DRIP 205 (NR2) <sup>4</sup>                                                                               | EDO FMT (C <sub>27</sub> H <sub>44</sub> O <sub>3</sub> )             | 5XPO               | 2.28 Å                  |           | 25-(hydroxyphenyl)-2-methylidene-19,26,27-trinor-25-oxo-1-hydroxyvitamin D <sub>3</sub> + DRIP205 (NR2) <sup>4</sup>               | 8BL (C <sub>31</sub> H <sub>42</sub> O <sub>4</sub> )     |
|            | 3VT4               | 1.9 Å                   |           | 2Z-hydroxyethylidene-16-ene-22-thia-1,25-dinorvitamin D <sub>3</sub> + DRIP 205 (NR2) <sup>4</sup>                             | 5Y1 (C <sub>28</sub> H <sub>44</sub> O <sub>4</sub> S)                | 5XPP               | 2.85 Å                  |           | 25RS-(Hydroxyphenyl)-2-methylidene-19,26,27-trinor-1,25D <sub>3</sub> + DRIP205 (NR2) <sup>4</sup>                                 | 8BF (C <sub>31</sub> H <sub>44</sub> O <sub>4</sub> )     |



| Orthologue | PDBID <sup>1</sup> | Resolution <sup>2</sup> | Reference | Ligand Name/Notes                                                                                                            | Ligand Conformation <sup>3</sup>                                                                                                                   | PDBID <sup>1</sup> | Resolution <sup>2</sup> | Reference | Ligand Name/Notes                                                                                                                      | Ligand Conformation <sup>3</sup>                                                                                                                   |
|------------|--------------------|-------------------------|-----------|------------------------------------------------------------------------------------------------------------------------------|----------------------------------------------------------------------------------------------------------------------------------------------------|--------------------|-------------------------|-----------|----------------------------------------------------------------------------------------------------------------------------------------|----------------------------------------------------------------------------------------------------------------------------------------------------|
| RAT        | 3VT5               | 2.11 Å                  |           | 2E-hydroxyethylidene-16-ene-22-thia-1,25-dinorvitamin D <sub>3</sub><br><b>rVDR_R270L</b><br>+ DRIP 205 (NR2) <sup>4</sup>   | 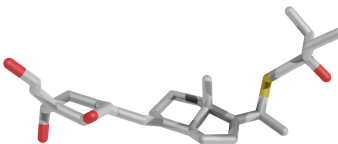<br>Y12 (C <sub>28</sub> H <sub>44</sub> O <sub>4</sub> S)       | 5XUQ               | 2.8 Å                   | —         | 2-methylidene-19,26,27-trinor-22-(S)-butyl-1-hydroxy-25-oxo-25-(1H-pyrrol-2-yl)-vitamin D <sub>3</sub><br>+ DRIP205 (NR2) <sup>4</sup> | <br>8FF (C <sub>33</sub> H <sub>49</sub> NO <sub>3</sub> )      |
|            | 3VT6               | 2.3 Å                   |           | 2Z-hydroxyethylidene-16-ene-22-thia-1,25-dinorvitamin D <sub>3</sub><br><b>rVDR_WT</b><br>+ DRIP 205 (NR2) <sup>4</sup>      | <br>5Y1 (C <sub>28</sub> H <sub>44</sub> O <sub>4</sub> S)       | 5XZF               | 2.1 Å                   |           | 25S-(Adamantan-1-yl)-26,27-dinor-23-yne-1α,25D <sub>3</sub> (ADRO1)<br>+ DRIP205 (NR2) <sup>4</sup>                                    | <br>8J0 (C <sub>35</sub> H <sub>50</sub> O <sub>3</sub> )       |
|            | 3VT7               | 1.65 Å                  | [121]     | 1,25D <sub>3</sub><br><b>rVDR_W282R</b><br>+ DRIP 205 (NR2) <sup>4</sup>                                                     | <br>VDX (C <sub>27</sub> H <sub>44</sub> O <sub>3</sub> )        | 5XZH               | 2 Å                     |           | 25R-(Adamantan-1-yl)-26,27-dinor-23-yne-1α,25D <sub>3</sub> (ADRO2)<br>+ DRIP205 (NR2) <sup>4</sup>                                    | <br>8J3 (C <sub>35</sub> H <sub>50</sub> O <sub>3</sub> )       |
|            | 3VT8               | 2.1 Å                   |           | 9α-butyl-1,25-norvitamin D <sub>3</sub><br><b>rVDR_W282R</b><br>+ DRIP 205 (NR2) <sup>4</sup>                                | <br>Y13 (C <sub>30</sub> H <sub>52</sub> O <sub>3</sub> )        | 5ZWE               | 2.72 Å                  |           | 1,3-Dihydroxy-2-methylidene-9,10-secoestra-5,7-dien-17-(hept-1-en-3-one)<br>+ DRIP205 (NR2) <sup>4</sup>                               | <br>9K0 (C <sub>26</sub> H <sub>38</sub> O <sub>3</sub> )       |
|            | 3VT9               | 2.35 Å                  |           | 2-hydroxyethylidene-9α-(prop-2-en-1-yl)-1,25-norvitamin D <sub>3</sub><br><b>rVDR_W282R</b><br>+ DRIP 205 (NR2) <sup>4</sup> | <br>5Y4 (C <sub>31</sub> H <sub>51</sub> O <sub>4</sub> )       | 5ZWF               | 2.1 Å                   |           | 1,3-Dihydroxy-2-methylidene-9,10-secoestra-5,7-dien-17(-oct-2-en-4-one)<br>+ DRIP205 (NR2) <sup>4</sup>                                | <br>9KR (C <sub>27</sub> H <sub>40</sub> O <sub>3</sub> )      |
|            | 3VTB               | 2 Å                     |           | 2-methylidene-25S-25-adamantyl-19,26,27-trinorvitamin-1,25D <sub>3</sub> (ADTK1)<br>+ DRIP 205 (NR2) <sup>4</sup>            | <br>TKA (C <sub>35</sub> H <sub>50</sub> O <sub>3</sub> )      | 5ZWH               | 2.38 Å                  |           | 1,3-Dihydroxy-2-methylidene-9,10-secoestra-5,7-dien-17-(oct-6-en-4-yn-3-one)<br>+ DRIP205 (NR2) <sup>4</sup>                           | <br>9KX 9N9 (C <sub>27</sub> H <sub>36</sub> O <sub>3</sub> ) |
|            | 3VTC               | 1.5 Å                   | [122]     | 2-methylidene-25R-26-adamantyl-19,27-dinorvitamin 1,25D <sub>3</sub> (ADTK3)<br>+ DRIP 205 (NR2) <sup>4</sup>                | <br>EDO, TK3 (C <sub>36</sub> H <sub>52</sub> O <sub>3</sub> ) | 5ZWI               | 2.4 Å                   |           | 1,3-Dihydroxy-2-methylidene-9,10-secoestra-5,7-dien-17-(octa-4,6-dien-3-one)<br>+ DRIP205 (NR2) <sup>4</sup>                           | <br>9KX (C <sub>27</sub> H <sub>38</sub> O <sub>3</sub> )     |

| Orthologue       | PDBID <sup>1</sup> | Resolution <sup>2</sup> | Reference | Ligand Name/Notes                                                      | Ligand Conformation <sup>3</sup>                                     | PDBID <sup>1</sup> | Resolution <sup>2</sup> | Reference | Ligand Name/Notes                                                                                                                    | Ligand Conformation <sup>3</sup>                                      |
|------------------|--------------------|-------------------------|-----------|------------------------------------------------------------------------|----------------------------------------------------------------------|--------------------|-------------------------|-----------|--------------------------------------------------------------------------------------------------------------------------------------|-----------------------------------------------------------------------|
| <b>ZEBRAFISH</b> | 2HBH               | 2.65 Å                  | [135]     | 21-nor-20(22),23-diyne-1,25D <sub>3</sub><br>+ SRC1 (NR2) <sup>6</sup> | XE4 (C <sub>26</sub> H <sub>34</sub> O <sub>3</sub> )                | 4RUP               | 2.75 Å                  | [140]     | Gemini-0097<br><b>zVDR_L337H</b><br>+ SRC1 (NR2) <sup>6</sup>                                                                        | H97 (C <sub>31</sub> H <sub>44</sub> F <sub>6</sub> O <sub>4</sub> )  |
|                  | 2HC4               | 2.2 Å                   | [136]     | 1,25D <sub>3</sub><br>+ SRC1 (NR2) <sup>6</sup>                        | VDX (C <sub>27</sub> H <sub>44</sub> O <sub>3</sub> )                | 5E7V               | 2.4 Å                   | [44]      | 1 $\alpha$ -hydroxy-27-nor-25-o-carbonyl-vitamin D <sub>3</sub><br>+ SRC1 (NR2) <sup>6</sup>                                         | M7E (C <sub>26</sub> H <sub>37</sub> B <sub>10</sub> O <sub>2</sub> ) |
|                  | 2HCD               | 2.6 Å                   |           | Gemini<br>+ SRC1 (NR2) <sup>6</sup>                                    | BIV (C <sub>32</sub> H <sub>54</sub> O <sub>4</sub> )                | 5LGA               | 2.5 Å                   | [141]     | BXL0124<br>+ TIF2 (NR2) <sup>5</sup>                                                                                                 | 6VH (C <sub>32</sub> H <sub>40</sub> F <sub>6</sub> O <sub>4</sub> )  |
|                  | 3DR1               | 2.7 Å                   | [137]     | CD578<br>+ SRC1 (NR2) <sup>6</sup>                                     | C5D (C <sub>24</sub> H <sub>32</sub> F <sub>6</sub> O <sub>3</sub> ) | 5MX7               | 1.98 Å                  | [142]     | 1 $\alpha$ ,20S-dihydroxyvitamin D <sub>3</sub><br>+ SRC1 (NR2) <sup>6</sup>                                                         | D3V (C <sub>27</sub> H <sub>44</sub> O <sub>3</sub> )                 |
|                  | 301D               | 2.4 Å                   | [138]     | Gemini-0072<br>+ SRC1 (NR2) <sup>6</sup>                               | G72 (C <sub>31</sub> H <sub>44</sub> F <sub>6</sub> O <sub>4</sub> ) | 5NKY               | 2.1 Å                   |           | (22S)-[(5'S)-(2"-hydroxy-2"-propyl)-(2'R)-tetrahydrofuryl]-22,23,24,25,26,27-hexanor-1,25D <sub>3</sub><br>+ SRC1 (NR2) <sup>6</sup> | 91W (C <sub>28</sub> H <sub>44</sub> O <sub>4</sub> )                 |
|                  | 301E               | 2.5 Å                   |           | Gemini-0097<br>+ SRC1 (NR2) <sup>6</sup>                               | H97 (C <sub>31</sub> H <sub>44</sub> F <sub>6</sub> O <sub>4</sub> ) | 5NMA               | 2.8 Å                   | [143]     | (22S)-[(5'R)-(2"-hydroxy-2"-propyl)-(2'S)-tetrahydrofuryl]-22,23,24,25,26,27-hexanor-1,25D <sub>3</sub><br>+ SRC1 (NR2) <sup>6</sup> | 9CW (C <sub>28</sub> H <sub>44</sub> O <sub>4</sub> )                 |
|                  | 4FHH               | 2.33 Å                  | [139]     | JF-C72<br>+ SRC1 (NR2) <sup>6</sup>                                    | OU3 (C <sub>27</sub> H <sub>39</sub> NO <sub>5</sub> )               | 5NMB               | 2.5 Å                   |           | (22S)-[(5'S)-(2"-hydroxy-2"-propyl)-(2'S)-tetrahydrofuryl]-22,23,24,25,26,27-hexanor-1,25D <sub>3</sub><br>+ SRC1 (NR2) <sup>6</sup> | 9CZ (C <sub>28</sub> H <sub>44</sub> O <sub>4</sub> )                 |

| Orthologue       | PDBID <sup>1</sup> | Resolution <sup>2</sup> | Reference | Ligand Name/Notes                   | Ligand Conformation <sup>3</sup>                                     | PDBID <sup>1</sup> | Resolution <sup>2</sup> | Reference | Ligand Name/Notes                                                                                                                                      | Ligand Conformation <sup>3</sup>                       |  |
|------------------|--------------------|-------------------------|-----------|-------------------------------------|----------------------------------------------------------------------|--------------------|-------------------------|-----------|--------------------------------------------------------------------------------------------------------------------------------------------------------|--------------------------------------------------------|--|
| <b>ZEBRAFISH</b> | 4FHI               | 2.4 Å                   | [139]     | JF-C71<br>+ SRC1 (NR2) <sup>6</sup> | OS4 (C <sub>27</sub> H <sub>39</sub> NO <sub>5</sub> )               | 50W7               | 2.1 Å                   |           | 20- <i>N</i> -isopropylacetamide-<br>1,20S-dihydroxyvitamin D <sub>3</sub><br>+ SRC1 (NR2) <sup>6</sup>                                                | AYK (C <sub>26</sub> H <sub>41</sub> NO <sub>3</sub> ) |  |
|                  | 4G1D               | 2.9 Å                   |           | CD4720<br>+ SRC1 (NR2) <sup>6</sup> | OVK (C <sub>30</sub> H <sub>38</sub> O <sub>4</sub> )                | 50W9               | 2.4 Å                   | [144]     | 20S-hydroxyvitamin D <sub>3</sub><br>+ SRC1 (NR2) <sup>6</sup>                                                                                         | AYT (C <sub>27</sub> H <sub>44</sub> O <sub>2</sub> )  |  |
|                  | 4G1Y               | 2.85 Å                  |           | CD3938<br>+ SRC1 (NR2) <sup>6</sup> | OVO (C <sub>26</sub> H <sub>34</sub> O <sub>4</sub> )                | 50WD               | 2.15 Å                  |           | 24-ene-20S-hydroxyvitamin D <sub>3</sub><br>+ SRC1 (NR2) <sup>6</sup>                                                                                  | BOB (C <sub>27</sub> H <sub>42</sub> O <sub>2</sub> )  |  |
|                  | 4G1Z               | 2.5 Å                   |           | CD4802<br>+ SRC1 (NR2) <sup>6</sup> | OVP (C <sub>31</sub> H <sub>40</sub> O <sub>4</sub> )                | 6F07               | 2.59 Å                  |           | (1R,3S,Z)-5-[(E)-3-[3-(6-Hydroxy-6-<br>methylheptyl) phenyl]hept-2-en-1-<br>ylidene]-4- methylene<br>cyclohexane-1,3-diol<br>+ SRC1 (NR2) <sup>6</sup> | LX3 (C <sub>28</sub> H <sub>42</sub> O <sub>3</sub> )  |  |
|                  |                    |                         | [108]     |                                     |                                                                      |                    |                         |           |                                                                                                                                                        |                                                        |  |
|                  | 4G20               | 2.9 Å                   |           | CD4849<br>+ SRC1 (NR2) <sup>6</sup> | 484 (C <sub>31</sub> H <sub>40</sub> O <sub>3</sub> )                | 6F08               | 2.3 Å                   |           | (1R,3S,Z)-5-[(E)-3-[3-(6-Hydroxy-6-<br>methylheptyl) phenyl]non-2-en-1-<br>ylidene]-4- methylene<br>cyclohexane-1,3-diol<br>+ SRC1 (NR2) <sup>6</sup>  | DZT (C <sub>30</sub> H <sub>46</sub> O <sub>3</sub> )  |  |
|                  | 4G21               | 2.9 Å                   |           | CD4742<br>+ SRC1 (NR2) <sup>6</sup> | OVP (C <sub>31</sub> H <sub>40</sub> O <sub>4</sub> )                |                    |                         | [83]      | (1R,3S,Z)-5-[(E)-3-[3-(6-Hydroxy-6-<br>methylheptyl) phenyl]hex-2-en-1-<br>ylidene]-4-<br>methylenecyclohexane- 1,3-diol<br>+ SRC1 (NR2) <sup>6</sup>  | EOE (C <sub>27</sub> H <sub>40</sub> O <sub>3</sub> )  |  |
|                  | 4G2H               | 2.5 Å                   |           | CD4528<br>+ SRC1 (NR2) <sup>6</sup> | OVQ (C <sub>25</sub> H <sub>26</sub> F <sub>6</sub> O <sub>3</sub> ) | 6F09               | 2.7 Å                   |           | (1R,3S,Z)-5-[(E)-3-[3-(6-Hydroxy-6-<br>methylheptyl) phenyl]dec-2-en-1-<br>ylidene]-4- methylene<br>cyclohexane-1,3-diol<br>+ SRC1 (NR2) <sup>6</sup>  | DZW (C <sub>31</sub> H <sub>48</sub> O <sub>3</sub> )  |  |
|                  |                    |                         |           |                                     |                                                                      | 6FOB               | 2.75 Å                  |           |                                                                                                                                                        |                                                        |  |

|            | Orthologue | PDBID <sup>1</sup> | Resolution <sup>2</sup> | Reference | Ligand Name/Notes                                                    | Ligand Conformation <sup>3</sup>                      |  | PDBID <sup>1</sup> | Resolution <sup>2</sup> | Reference | Ligand Name/Notes                                                                                                                         | Ligand Conformation <sup>3</sup>                      |
|------------|------------|--------------------|-------------------------|-----------|----------------------------------------------------------------------|-------------------------------------------------------|--|--------------------|-------------------------|-----------|-------------------------------------------------------------------------------------------------------------------------------------------|-------------------------------------------------------|
| ZEBRAFISH  | 4RUJ       |                    | 2.35 Å                  |           | 1,25D <sub>3</sub><br><b>zVDR_L337H</b><br>+ SRC1 (NR2) <sup>6</sup> | VDX (C <sub>27</sub> H <sub>44</sub> O <sub>3</sub> ) |  | 6FOD               | 2.5 Å                   | [83]      | (1R,3S,Z)-5-((E)-3-[3-(6-Hydroxy-6-methylheptyl)phenyl]pent-2-en-1-ylidene)-4-methylene cyclohexane-1,3-diol<br>+ SRC1 (NR2) <sup>6</sup> | E05 (C <sub>26</sub> H <sub>38</sub> O <sub>3</sub> ) |
|            |            | 4RUO               |                         | 2.81 Å    | [140]<br>Gemini<br><b>zVDR_L337H</b><br>+ SRC1 (NR2) <sup>6</sup>    | BIV (C <sub>32</sub> H <sub>54</sub> O <sub>4</sub> ) |  |                    |                         |           |                                                                                                                                           |                                                       |
| UNRELEASED | 4XWQ       |                    | -                       | -         | 1,25D <sub>3</sub> -26,23-lactams (DLAMS)                            |                                                       |  | 4XY0               | -                       | -         | 1,25D <sub>3</sub> -26,23-lactams (DLAMS)                                                                                                 |                                                       |
|            | 4XXZ       |                    | -                       | -         | 1,25D <sub>3</sub> -26,23-lactams (DLAMS)                            |                                                       |  | 4XY1               | -                       | -         | 1,25D <sub>3</sub> -26,23-lactams (DLAMS)                                                                                                 |                                                       |

<sup>1</sup> Protein Data Bank identifier

<sup>2</sup> Atomic resolution of the crystal structure in Ångström

<sup>3</sup> The conformation of the ligand extracted from the crystal structure

<sup>4</sup> Synthetic peptide corresponding to NR2 Box of DRIP205/TRAP220/MED1 625-KNHPMLMNLKDN-637

<sup>5</sup> Synthetic peptide corresponding to NR2 Box of TIF2/NCOA2 740-KENALLRYLLDKD-752

<sup>6</sup> Synthetic peptide corresponding to NR2 Box of SRC1/NCOA1 686-RHKILHRLLEQEGSPS-700

— no publication available
